# Supplementary material for: Complement and coagulation cascades pathway-related signature as a predictor of immunotherapy in metastatic urothelial cancer
Source: Aging (Albany NY). 2023 Sep 24;15(18):9479–98. doi: 10.18632/aging.205022 (PMC10564431; doi:10.18632/aging.205022)
Supplement: Supplementary Table 4 [file aging-15-205022-s004.pdf]

**Supplementary Table 4. Summary results of LASSO regression.**

|                 | <b>Training subset</b> | <b>Test subset</b> |
|-----------------|------------------------|--------------------|
| Not significant | 0                      | 143 (14.3%)        |
| Significant     | 1000 (100%)            | 857 (85.7%)        |
